# Supplementary material for: Dynamics based clustering of globin family members
Source: PubMed Central journal article supplement (PMC6279032; doi:10.1371/journal.pone.0208465), 2018-12-04
Supplement: pone.0208465.s004.pdf [file pone.0208465.s004.pdf]

Height

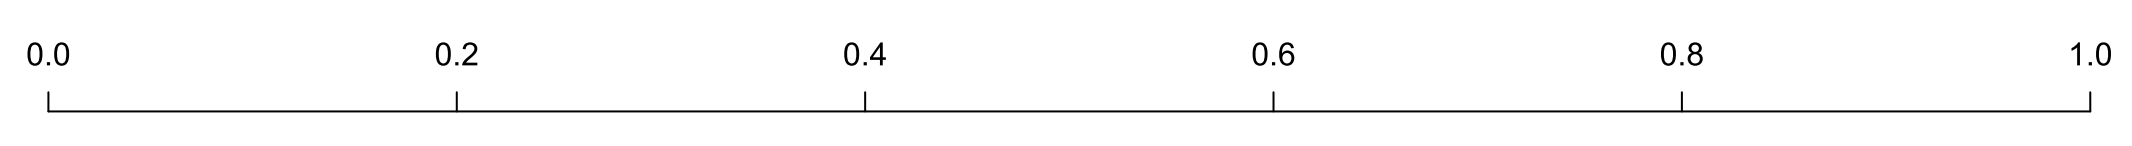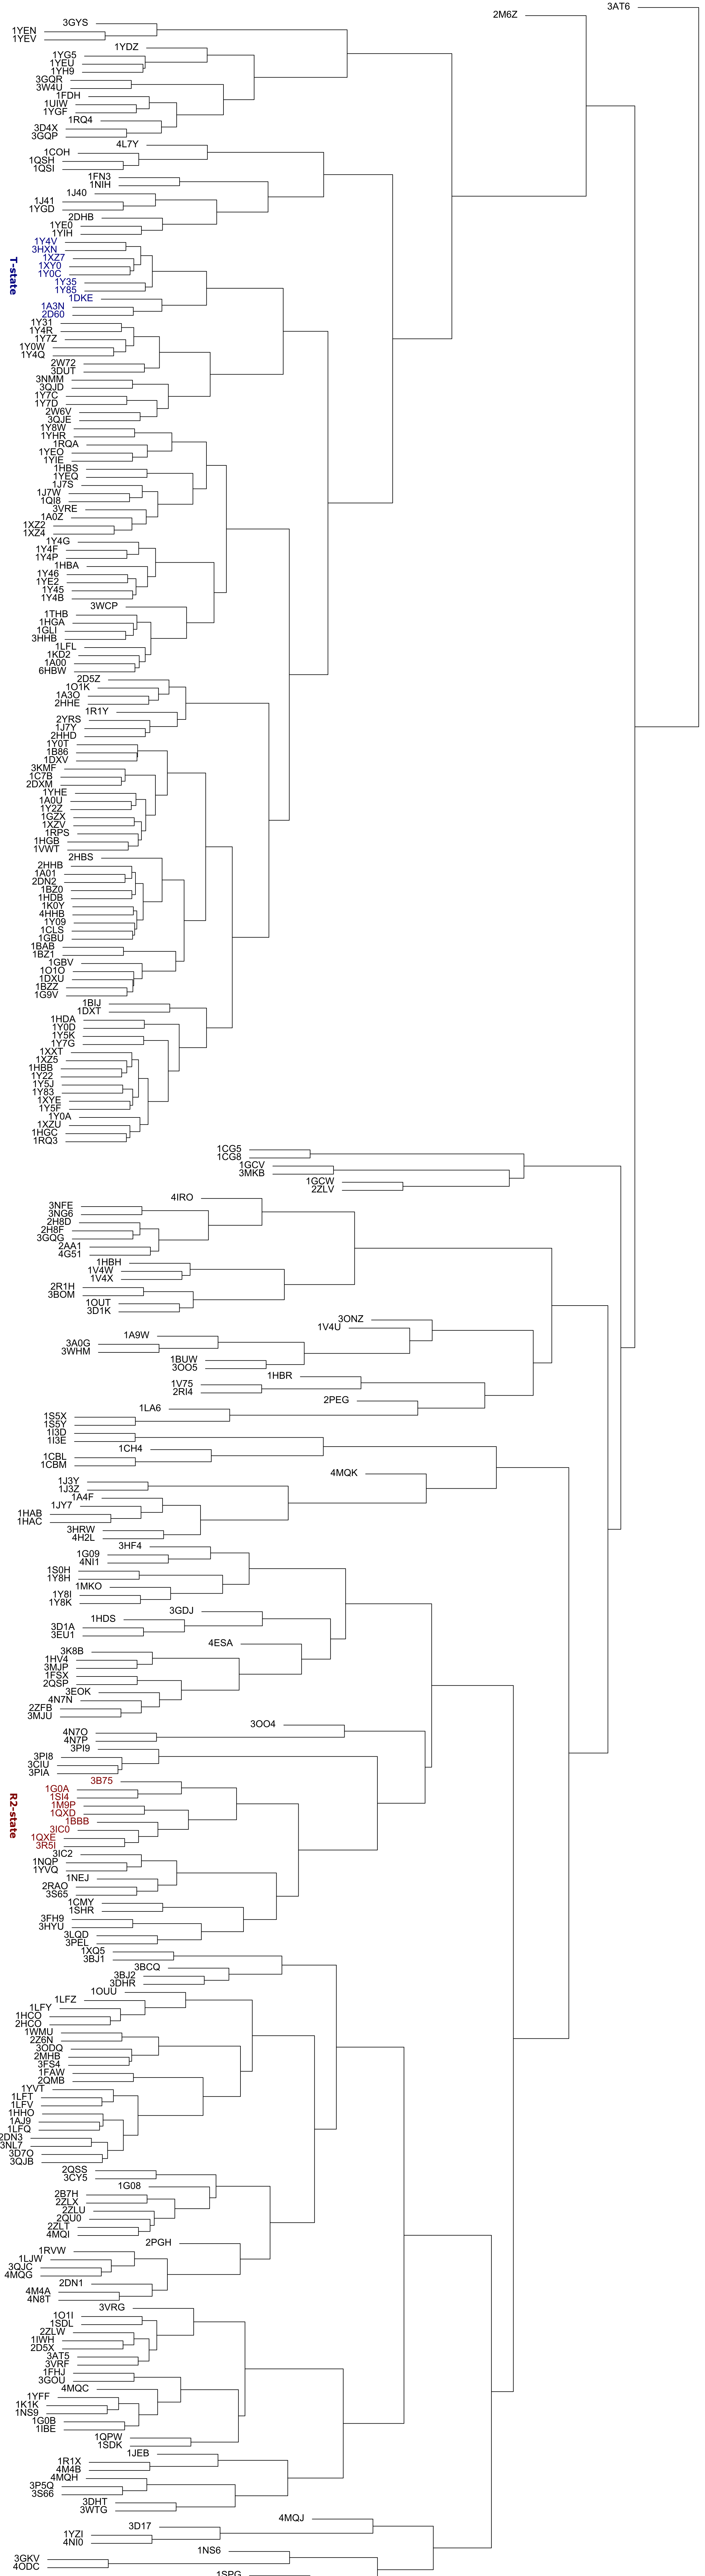

T-state

R2-state

Hemoglobin (dataset2) DSS-based dendrogram

as.dist(dsim)  
clus1("complete")
