# Supplementary material for: Dynamics based clustering of globin family members
Source: PubMed Central journal article supplement (PMC6279032; doi:10.1371/journal.pone.0208465), 2018-12-04
Supplement: pone.0208465.s005.pdf [file pone.0208465.s005.pdf]

Height

0.00 0.05 0.10 0.15 0.20 0.25 0.30 0.35

2M6Z  
3AT6

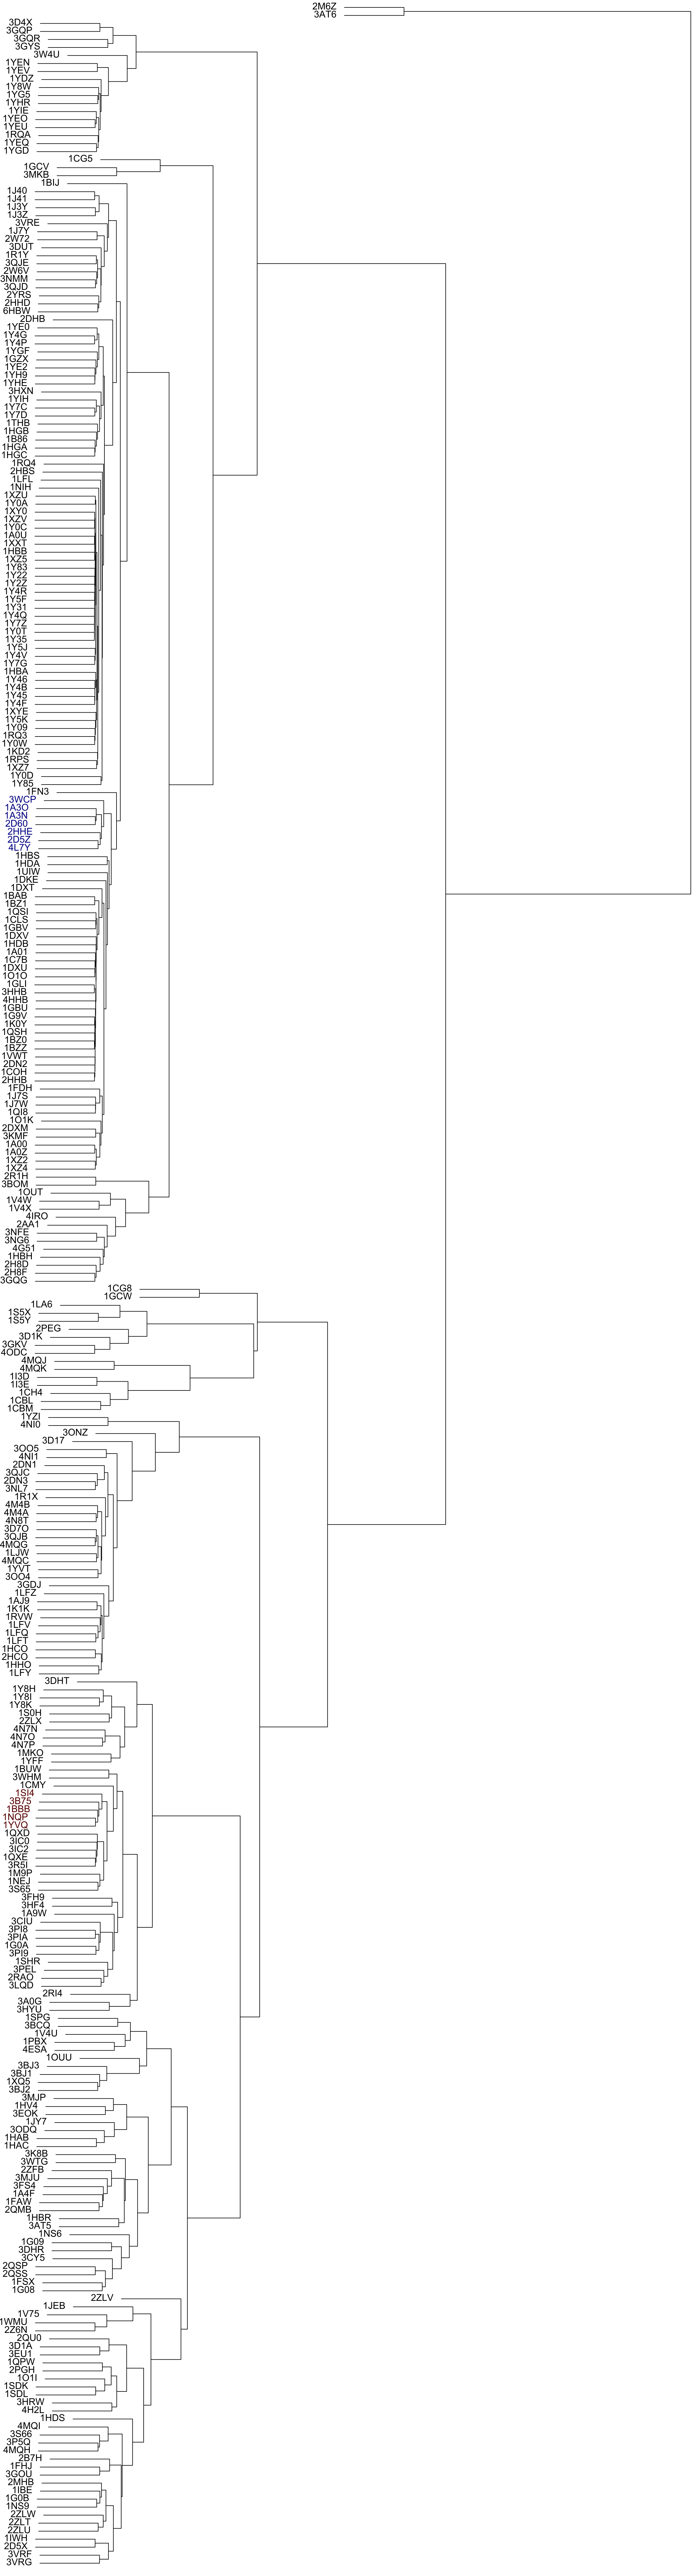

T-state

R2-state
